# Supplementary material
Source: MDPI journal article supplement (https://www.mdpi.com/2075-4701/14/5/573)
Supplement: s1 [file s1]

# Influence of Ti vacancy defects on the dissolution of O-adsorbed Ti(0001) surface: A first-principles study

Xiaoting Wang<sup>1</sup>, Dong Xie<sup>1\*</sup>, Fengjuan Jing<sup>2</sup>, Donglin Ma<sup>3</sup> and Yongxiang Leng<sup>2\*</sup>

<sup>1</sup> Key Laboratory of Advanced Technologies of Materials, Ministry of Education of China, School of Physical Science and Technology, Southwest Jiaotong University, Chengdu 610031, China

<sup>2</sup> Sichuan Province International Science and Technology Cooperation Base of Functional Materials, College of Medicine, Southwest Jiaotong University, Chengdu 610031, China

<sup>3</sup> College of Physics and Engineering, Chengdu Normal University, Chengdu 611130, China

\* Correspondence: xiedong@home.swjtu.edu.cn (D. Xie); yxleng@263.net (Y.X. Leng)

■ **Table S1.** Overlap population of Ti-O systems under different  $\theta$ .

| $\theta$<br>(ML) | $D_{\text{Ti-O}}$ (Å) |                | $D_{\text{O-O}}$ (Å) |                | Population of Ti-O bond |                | Population of O-O bond |                |
|------------------|-----------------------|----------------|----------------------|----------------|-------------------------|----------------|------------------------|----------------|
|                  | Ti(0001)/O            | Ti(0001)/O-vac | Ti(0001)/O           | Ti(0001)/O-vac | Ti(0001)/O              | Ti(0001)/O-vac | Ti(0001)/O             | Ti(0001)/O-vac |
| 1/9              | 1.933                 | 1.949          | —                    | —              | 0.360                   | 0.343          | —                      | —              |
| 2/9              | 1.932                 | 1.946          | —                    | —              | 0.360                   | 0.350          | —                      | —              |
| 1/3              | 1.929                 | 1.934          | —                    | —              | 0.357                   | 0.348          | —                      | —              |
| 4/9              | 1.932                 | 1.942          | —                    | —              | 0.365                   | 0.353          | —                      | —              |
| 5/9              | 1.929                 | 1.893          | 2.751                | 2.895          | 0.369                   | 0.405          | -0.020                 | -0.010         |
| 2/3              | 1.922                 | 1.895          | 2.938                | 2.911          | 0.367                   | 0.393          | -0.010                 | -0.010         |
| 7/9              | 1.926                 | 1.882          | 2.846                | 2.868          | 0.374                   | 0.411          | -0.016                 | -0.013         |
| 8/9              | 1.923                 | 1.883          | 2.829                | 2.891          | 0.376                   | 0.404          | -0.018                 | -0.013         |
| 1                | 1.920                 | 1.887          | 2.776                | 2.941          | 0.380                   | 0.406          | -0.020                 | -0.020         |

Notes:  $D_{\text{Ti-O}}$  represents the average bond length of Ti-O, as shown in **Fig. 7(b)**.  $D_{\text{O-O}}$  represents the average bond length of O-O.
